# Supplementary material
Source: PubMed Central journal article supplement (PMC3360827)
Supplement: NIHMS371415-supplement-1_si_001.pdf [file NIHMS371415-supplement-1_si_001.pdf]

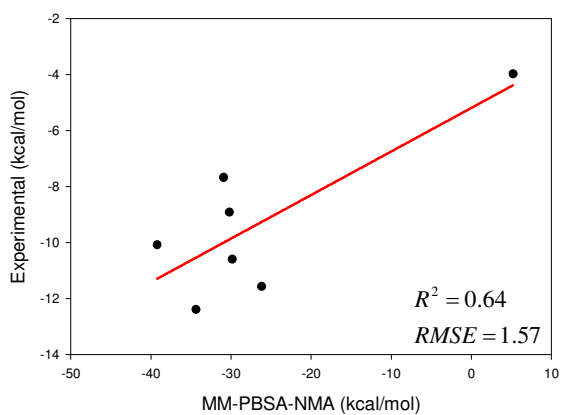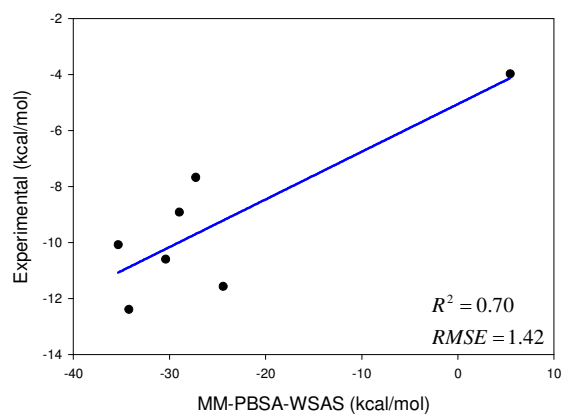

(a)

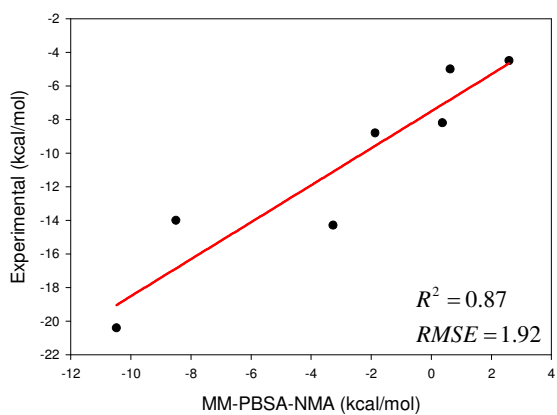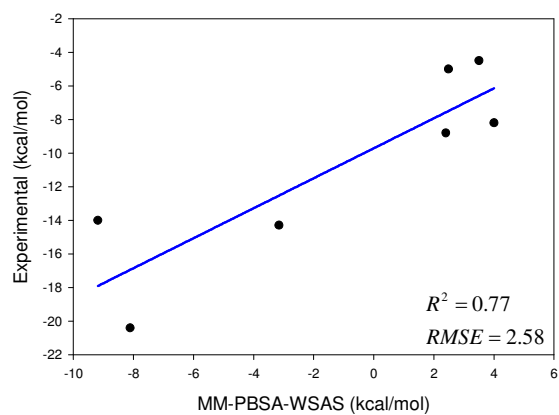

(b)

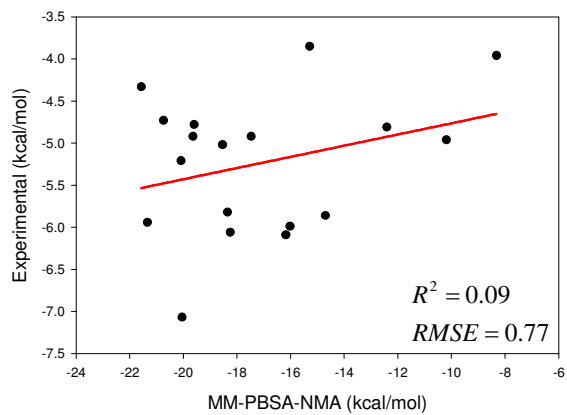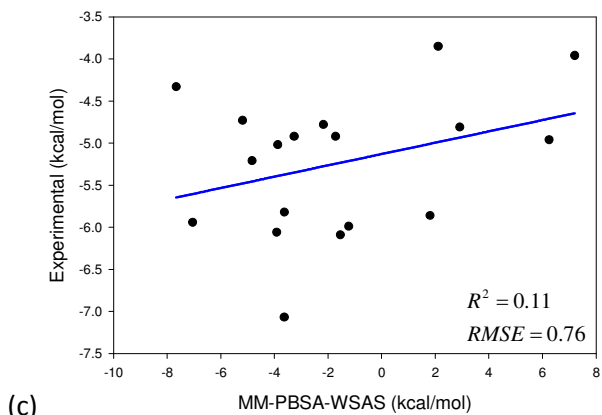

(c)

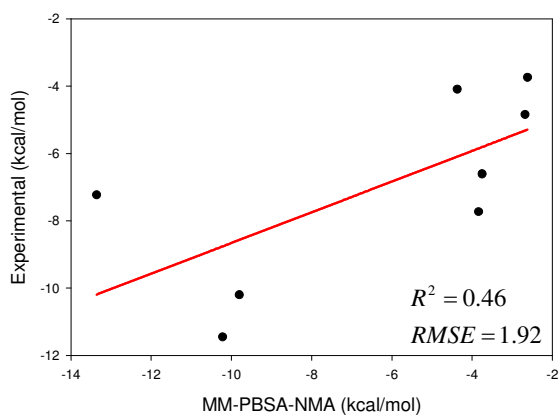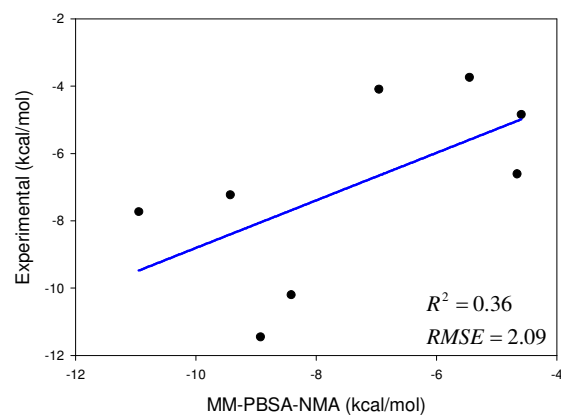

(d)

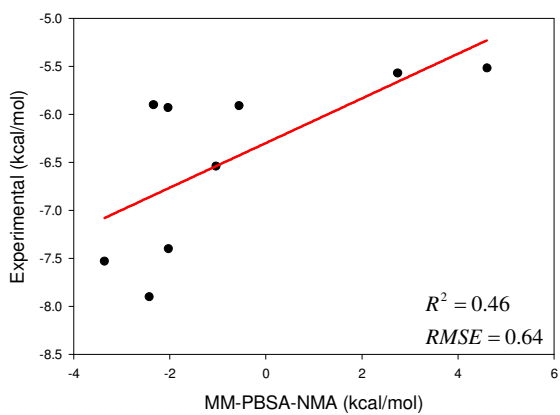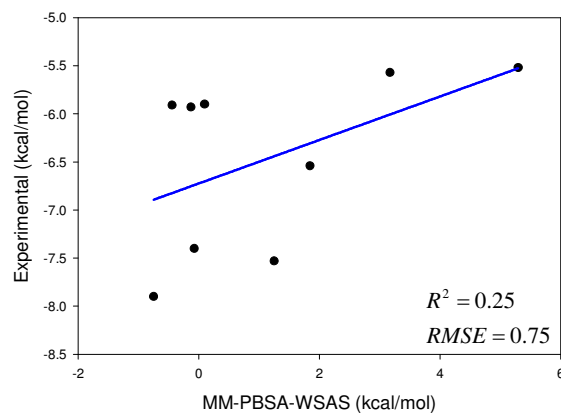

(e)

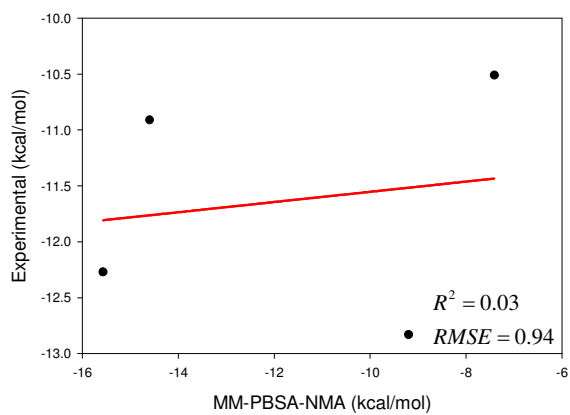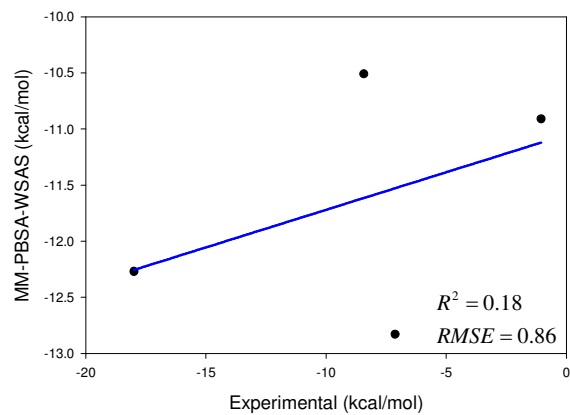

(f)

**Figure S1.** Comparison of two MM-PBSA protocols, MM-PBSA-NMA (right) and MM-PBSA-WSAS (left) in binding free energy calculations for six protein-ligand systems: (a)  $\alpha$ -thrombin, (b) avidin, (c) cytochrome C peroxidase, (d) neuraminidase, (e) P450cam, (f) penicillopepsin.
